# Supplementary material for: Genome-Wide Scan and Test of Candidate Genes in the Snail Biomphalaria glabrata Reveal New Locus Influencing Resistance to Schistosoma mansoni
Source: PubMed Central journal article supplement (PMC4570800; doi:10.1371/journal.pntd.0004077), 2015-09-15

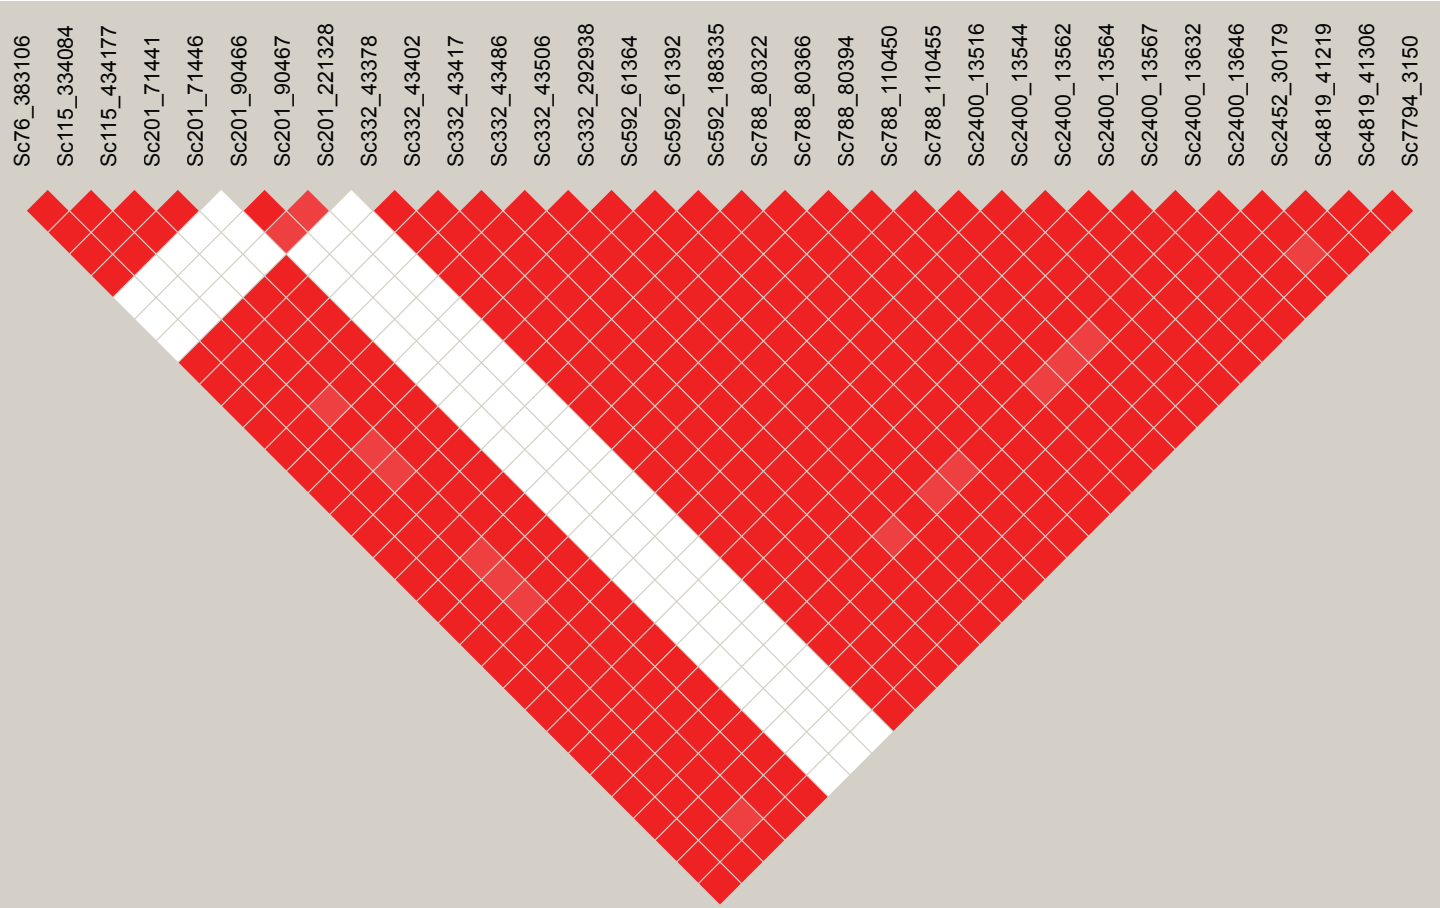

Supplement: pntd.0004077.s007.pdf [file pntd.0004077.s007.pdf]
