# Supplementary material for: Genome-Wide Scan and Test of Candidate Genes in the Snail Biomphalaria glabrata Reveal New Locus Influencing Resistance to Schistosoma mansoni
Source: PubMed Central journal article supplement (PMC4570800; doi:10.1371/journal.pntd.0004077), 2015-09-15
Supplement: pntd.0004077.s008.pdf [file pntd.0004077.s008.pdf]

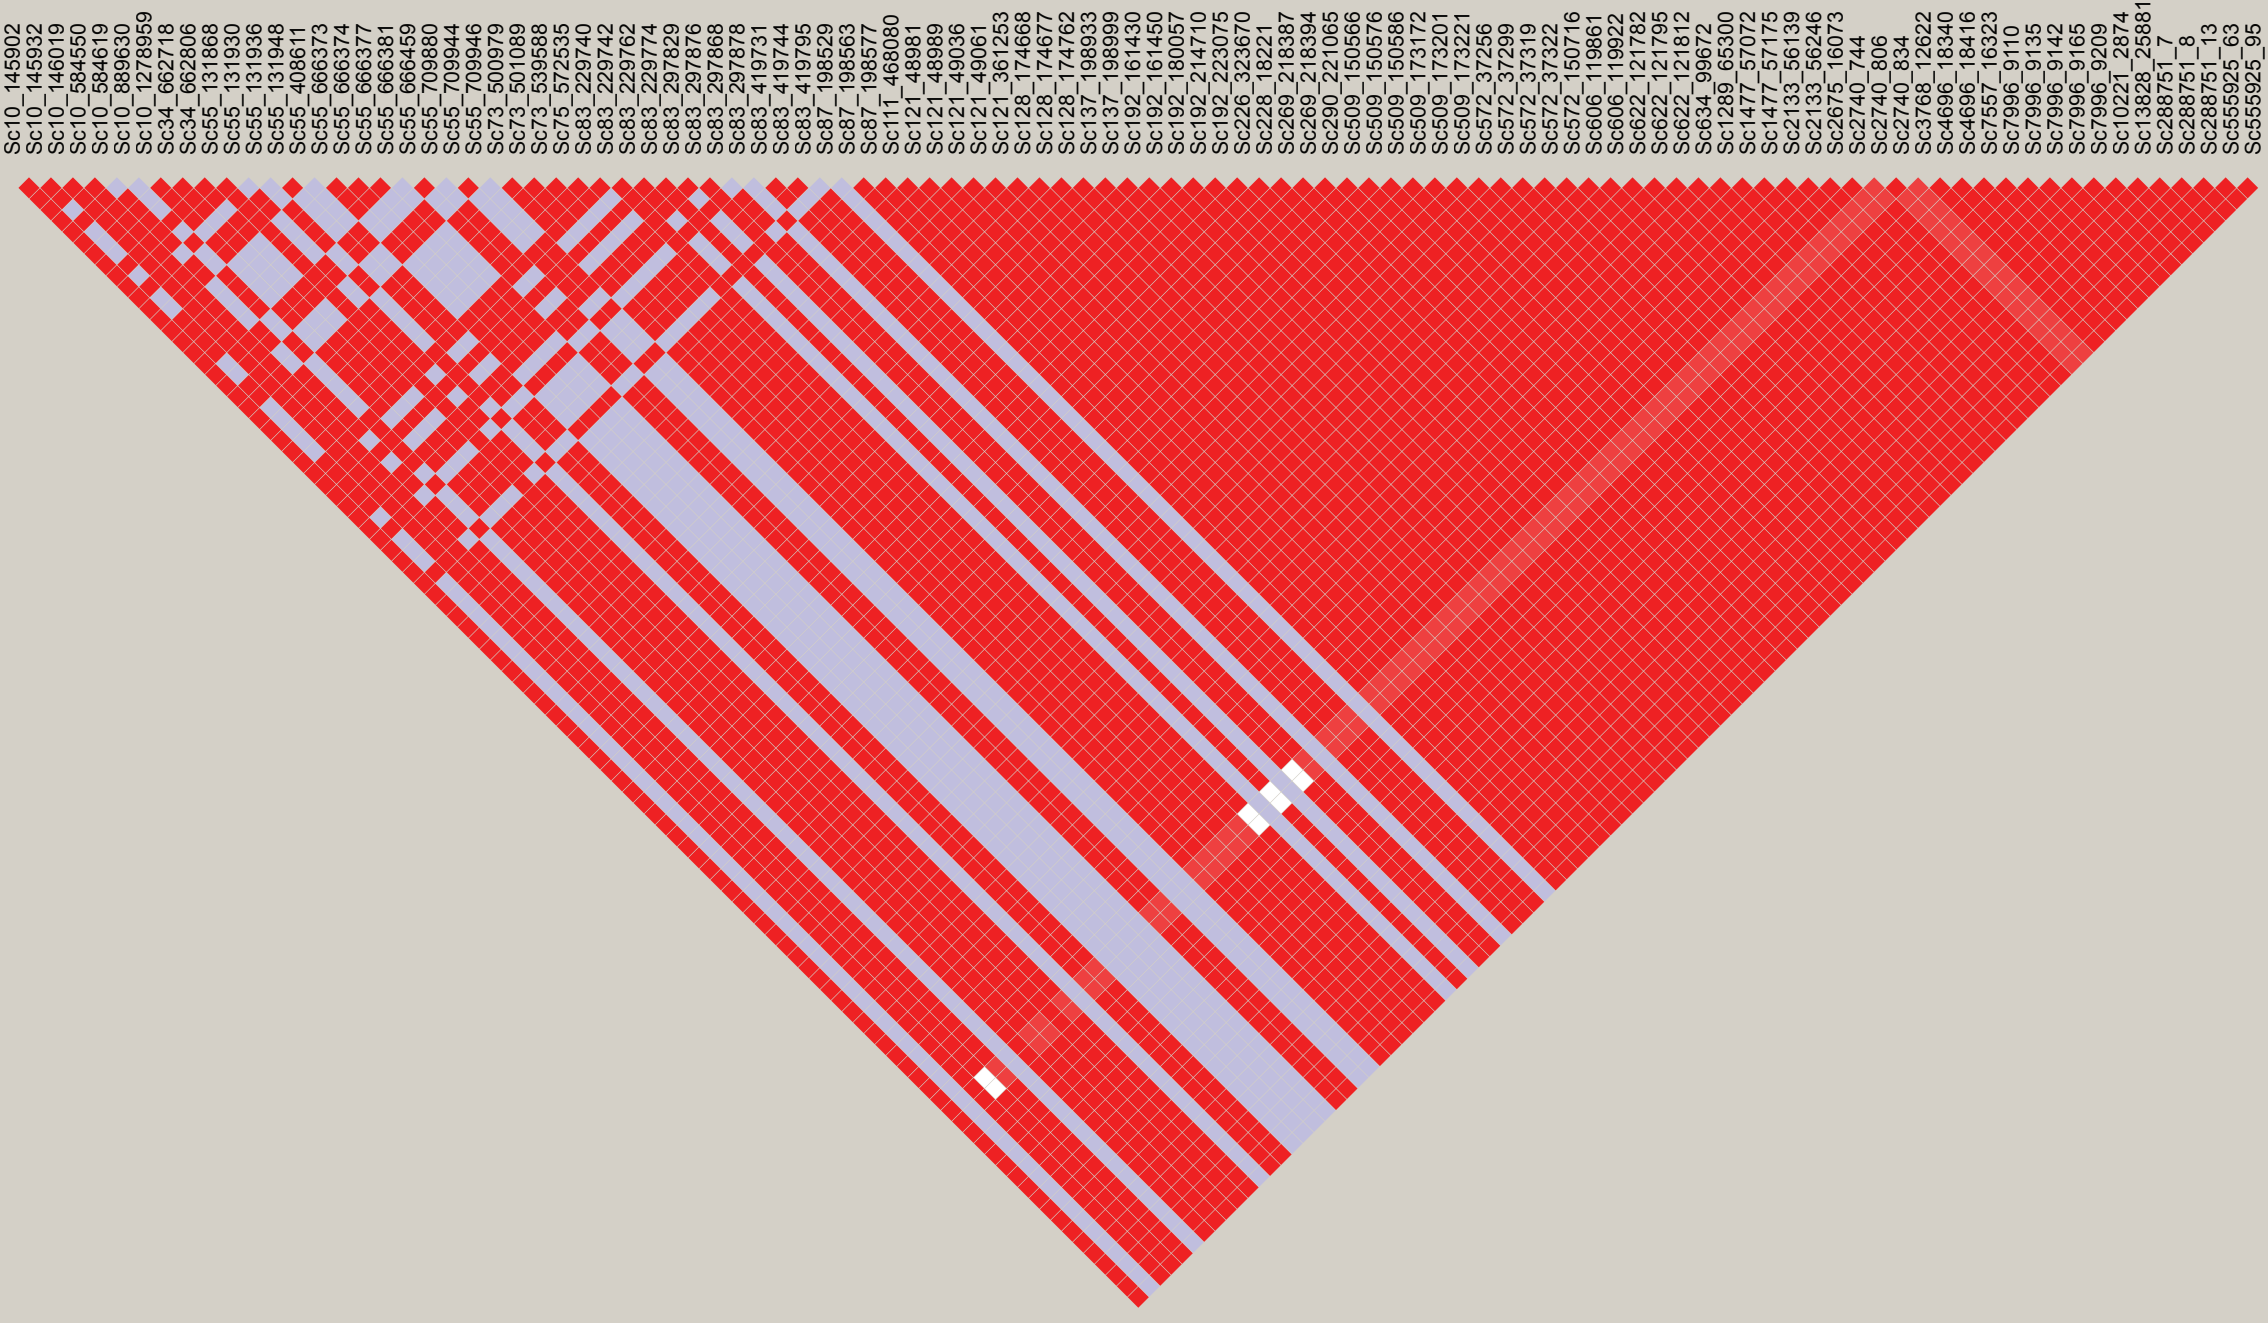

Sc10\_145902  
Sc10\_145932  
Sc10\_146019  
Sc10\_584550  
Sc10\_584619  
Sc10\_889630  
Sc10\_1278959  
Sc34\_662718  
Sc34\_662806  
Sc55\_131868  
Sc55\_131930  
Sc55\_131936  
Sc55\_131948  
Sc55\_408611  
Sc55\_666373  
Sc55\_666374  
Sc55\_666377  
Sc55\_666381  
Sc55\_666459  
Sc55\_709880  
Sc55\_709944  
Sc55\_709946  
Sc73\_500979  
Sc73\_501089  
Sc73\_539588  
Sc75\_572535  
Sc83\_229740  
Sc83\_229742  
Sc83\_229762  
Sc83\_229774  
Sc83\_297829  
Sc83\_297876  
Sc83\_297868  
Sc83\_297878  
Sc83\_419731  
Sc83\_419744  
Sc83\_419795  
Sc87\_198529  
Sc87\_198563  
Sc87\_198577  
Sc111\_468080  
Sc121\_48981  
Sc121\_48989  
Sc121\_49036  
Sc121\_49061  
Sc121\_49061  
Sc121\_361253  
Sc128\_174668  
Sc128\_174677  
Sc128\_174762  
Sc137\_198933  
Sc137\_198999  
Sc192\_161430  
Sc192\_161450  
Sc192\_180057  
Sc192\_214710  
Sc192\_223075  
Sc226\_323670  
Sc228\_18221  
Sc269\_218387  
Sc269\_218394  
Sc290\_221065  
Sc509\_150566  
Sc509\_150576  
Sc509\_150586  
Sc509\_173172  
Sc509\_173201  
Sc509\_173221  
Sc572\_37256  
Sc572\_37299  
Sc572\_37319  
Sc572\_37322  
Sc572\_150716  
Sc606\_119861  
Sc606\_119922  
Sc622\_121782  
Sc622\_121795  
Sc622\_121812  
Sc634\_99672  
Sc1289\_65300  
Sc1477\_57072  
Sc1477\_57175  
Sc2133\_56139  
Sc2133\_56246  
Sc2675\_16073  
Sc2740\_744  
Sc2740\_806  
Sc2740\_834  
Sc3768\_12622  
Sc4696\_18340  
Sc4696\_18416  
Sc7557\_16323  
Sc7996\_9110  
Sc7996\_9135  
Sc7996\_9142  
Sc7996\_9165  
Sc7996\_9209  
Sc10221\_2874  
Sc13828\_25881  
Sc288751\_7  
Sc288751\_8  
Sc288751\_13  
Sc555925\_63  
Sc555925\_95
