# Supplementary material for: Genome-Wide Scan and Test of Candidate Genes in the Snail Biomphalaria glabrata Reveal New Locus Influencing Resistance to Schistosoma mansoni
Source: PLoS Negl Trop Dis. 2015 Sep 15;9(9):e0004077. doi: 10.1371/journal.pntd.0004077 (PMC4570800; doi:10.1371/journal.pntd.0004077)
Supplement: S5 Table — (XLS) [file pntd.0004077.s005.xls]

## Sheet: Sheet1
S5 Table. Results from single-allele tests
Allele	β, additivea	p-value, additiveb	AIC, additivec	β, dominantd	p-value, dominante	AIC, dominantf
sod1_A	0.432152	0.00222574	584.04	0.515628	0.0178377	587.82		***	**	*	Signif. codes (After Bonferroni correction for 25 tests): ‘***’ 0.001 ‘**’ 0.01 ‘*’ 0.05
sod1_B	-0.758959	2.23277e-06	569.33	-0.850358	2.00988e-05	575.05		-1	0	1	Magnitude and sign of β
sod1_C	0.364123	0.0280035	588.74	0.490048	0.0153421	587.7
sod1_D	-0.634065	0.231917	592.03	-0.634065	0.231917	592.03
RADres1_E	-0.556507	0.000225838	579.64	-1.09346	0.000930325	582.1
RADres1_F	0.556507	0.000225838	579.64	0.566328	0.00433016	585.33
RADres2_G	-0.528498	0.000771412	582.06	-0.590378	0.109219	591.02
RADres2_H	0.524444	0.00477419	585.54	0.586689	0.00553985	585.89
RADres2_I	0.300467	0.158643	591.6	0.249655	0.296187	592.5
bmplys_J	0.623855	5.3228e-05	532.64	0.812621	0.0104519	534.33
bmplys_K	-0.623855	5.3228e-05	532.64	-0.816112	8.76215e-05	542.77
aif_L	0.116981	0.363902	592.75	0.266181	0.270901	592.35
aif_M	-0.153558	0.325094	592.61	-0.167566	0.396436	592.86
aif_N	-0.0553523	0.791167	593.51	-0.0750905	0.772141	593.5
aif_O	0.046698	0.869135	593.56	0.119381	0.708186	593.44
infPhox_P	0.115855	0.447351	593	0.174353	0.617435	593.33
infPhox_Q	-0.101926	0.532242	593.19	-0.116509	0.558436	593.24
infPhox_R	-0.146565	0.610627	593.32	-0.0909905	0.763069	593.49
infPhox_S	0.244608	0.690132	593.42	0.244608	0.690132	593.42
prx1_T	-0.00103174	0.994263	593.58	0.0280971	0.919231	593.57
prx1_U	-0.0378469	0.792343	593.51	-0.033416	0.866505	593.55
prx1_V	0.322941	0.432436	592.97	0.443584	0.311238	592.56
grc_W	0.0502389	0.783302	365.96	0.116763	0.652189	365.84
grc_X	-0.119351	0.540063	365.66	-0.162345	0.519329	365.62
grc_Y	0.0684645	0.735255	365.93	0.152824	0.542467	365.67
aMultiplicative effect of each copy of allele on odds of infection in addtive model
bUncorrected p-value for correlation with infection in logistic regression, additive model (significance assessed after Bonferroni correction)
cAkaike information criterion for additive model
dMultiplicative effect of possessing the allele on odds of infection in dominance model
eUncorrected p-value for correlation with infection in logistic regression, dominance model (significance assessed after Bonferroni correction)
fAkaike information criterion for dominance model
